# Supplementary material for: Specification and Evaluation of Plasticizer Migration Simulants for Human Blood Products: A Delphi Study
Source: Biomolecules. 2021 Jul 22;11(8):1081. doi: 10.3390/biom11081081 (PMC8392596; doi:10.3390/biom11081081)
Supplement: Supplementary file 1 [file biomolecules-11-01081-s001.zip › biomolecules-1282781-supplementary.pdf]

## Supplementary information

**Table S1.** Experts' degree, function, field of expertise and experience

| Expert's Name   | Degree      | Function                                      | Field of Expertise                      | Experience |
|-----------------|-------------|-----------------------------------------------|-----------------------------------------|------------|
| S Chatellier    | PhD         | Chief Executive Officer                       | Biology and transfusion medical devices | > 25 years |
| F. Cognasse     | PhD         | Research Director and scientific Director     | Biology                                 | > 15 years |
| C. Danel        | PhD         | Assistant professor                           | Analytical chemistry                    | > 15 years |
| B. Delorme      | PhD         | Scientific manager - R&D department           | Biotherapy medical devices              | > 25 years |
| L. Ducoroy      | PhD         | Engineer R&D                                  | Materials sciences                      | > 15 years |
| A. Dupont       | PhD, PharmD | Professor and hospital practitioner           | Clinical pharmacy                       | > 20 years |
| G. Hénard       | Engineer    | Components division manager - R&D department  | Transfusion medical devices             | > 25 years |
| D. Garrigue     | MD          | Intensive care anaesthetist                   | Anesthesia                              | > 20 years |
| S. Genay        | PhD, PharmD | Assistant professor and hospital practitioner | Clinical pharmacy                       | > 10 years |
| JF. Goossens    | PhD         | Professor                                     | Analytical chemistry                    | > 25 years |
| L. Goossens     | PhD         | Assistant professor                           | Organic chemistry                       | > 20 years |
| C. Havez        | Engineer    | Engineer R&D                                  | Biology and transfusion medical devices | > 5 years  |
| JD. Hecq        | PhD, PharmD | Professor and hospital practitioner           | Galenic pharmacy                        | > 30 years |
| M. Jeanne       | PhD, MD     | Intensive care anaesthetist                   | Anesthesia                              | > 15 years |
| M. Lecoœur      | PhD         | Assistant professor                           | Analytical chemistry                    | > 10 years |
| L. Leroy        | PhD         | Engineer R&D                                  | Materials sciences                      | > 5 years  |
| C. Maeght       | Engineer    | Engineer R&D                                  | Materials sciences                      | > 10 years |
| I. Mendel       | MD          | Hemovigilance and transfusion safety manager  | Hematology                              | > 25 years |
| T. Najdovski    | PhD         | Labile Blood Products Production Manager      | Chemistry and biology                   | > 30 years |
| P. Odou         | PhD         | Professor and hospital practitioner           | Galenic pharmacy                        | > 25 years |
| M. Pierre       | Master      | Engineer R&D                                  | Analytical chemistry                    | > 5 years  |
| A. Rapaille     | Master      | Quality control manager                       | Biology                                 | > 40 years |
| G. Saint-Lorant | PhD, PharmD | Assistant professor and hospital practitioner | Clinical pharmacy                       | > 10 years |
| A. Ung          | Master      | Engineer                                      | Biology and hematology                  | > 15 years |
